# Supplementary material for: Theoretical Model for Cellular Shapes Driven by Protrusive and Adhesive Forces
Source: PLOS journal article supplement (doi:10.1371/journal.pcbi.1001127), 2011-05-05
Supplement: S2 (10.1371/journal.pcbi.1001127.s002) [file journal.pcbi.1001127.s002]

301 Moved Permanently

# Moved Permanently

The document has moved here.

---

Apache Server at www.ploscompbiol.org Port 80
